# Supplementary material for: Political Survival in Colonial Botswana: The Preservation of Khama's State and Growth of the Ngwato Monarchy
Source: Royal Society of Chemistry journal article supplement (doi:10.1039/c9cp02770j), 1974-01-01
Supplement: c9cp02770j1.pdf [file c9cp02770j1.pdf]

## **Spin-lattice correlations in Eu<sup>3+</sup>-doped antiferromagnet TmFeO<sub>3</sub>**

Poorva Sharma,<sup>a, b</sup> Arvind Yogi,<sup>c</sup> Ashwini Kumar,<sup>d, e</sup> Rubin Li,<sup>a</sup> Gaurav Sharma,<sup>f</sup>

Jiyu Fan,<sup>b</sup> Vasant Sathe,<sup>f</sup> Qi Li,<sup>d</sup> Wei Ren,<sup>\*a</sup> and Shixun Cao<sup>†a</sup>

<sup>a</sup>Department of Physics, International Center for Quantum and Molecular Systems, Shanghai University,  
Shangda Road 99, Shanghai 200444, China

<sup>b</sup>Department of Applied Physics, Nanjing University of Aeronautics and Astronautics, Nanjing 210016, China

<sup>c</sup>Max-Planck-Institut für Festkörperforschung, Heisenbergstr. 1, D-70569 Stuttgart, Germany.

<sup>d</sup>School of Physics, Southeast University, Jiangning District, Nanjing, 211189, China

<sup>e</sup>School of Chemistry and Chemical Engineering, Southeast University, Jiangning District, Nanjing, 211189, China

<sup>f</sup>UGC-DAE Consortium for Scientific Research, Devi Ahilya University Campus, Khandwa Road, Indore, 452001, India

(Dated: July 22, 2019)

[\\*renwei@shu.edu.cn](mailto:renwei@shu.edu.cn), [†sxcao@shu.edu.cn](mailto:sxcao@shu.edu.cn)

## Supplementary Information (SI-1)

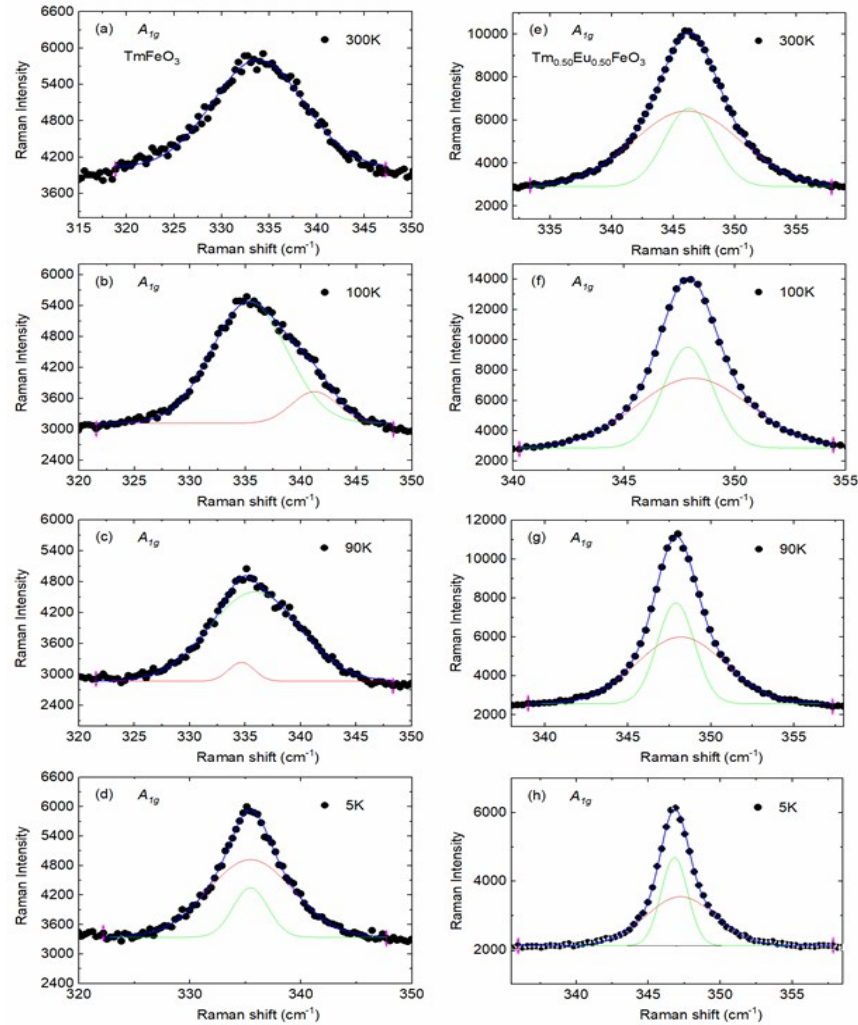

Fig. S1: Representation of Raman-active phonon modes for TmFeO<sub>3</sub> (a, b, c, d) and Tm<sub>0.5</sub>Eu<sub>0.5</sub>FeO<sub>3</sub> (e, f, g, h) compounds at different temperatures of 5, 90, 100 and 300K. The Raman spectra was acquired at excitation wavelength  $\lambda_{\text{exc}} = 633$  nm.

The lattice phonon modes are strongly coupled with magnetic ordering and show a clear sharp change near the transition as indicated by the light yellow vertical box as represented in manuscript in Fig. 5. Despite the clear change in Raman shift as a function of temperature are evident near the spin-reorientation transition, Raman scattering process are significantly different for the both compounds near the Raman-active phonon modes as a function of temperature as shown in Supplementary Information (SI-1), Fig. S1, Table S1 and S2. This indicates substitution of  $\text{Eu}^{3+}$  at  $\text{Tm}^{3+}$  ion in  $\text{TmFeO}_3$  strongly influenced magnetic properties through magnon-phonon (spin-lattice) coupling.

Table S1: Raman-active phonon modes as a function of temperature for  $\text{TmFeO}_3$  compound.

| Temperature<br>(K) | $A_{1g}/B_{1g}$     | $A_{1g}$ | $B_{1g}$ | $B_{1g}$ | $A_{1g}$ | $B_{2g}$ | $A_{1g}/B_{2g}/B_{3g}$ | $B_{2g}$ | $A_{1g}/B_{1g}$ | $B_{1g}$ | Two phonon |    |         |         |
|--------------------|---------------------|----------|----------|----------|----------|----------|------------------------|----------|-----------------|----------|------------|----|---------|---------|
|                    | (cm <sup>-1</sup> ) |          |          |          |          |          |                        |          |                 |          |            |    |         |         |
| 5                  | 113.042             | --       | 161.861  | --       | 335.122  | 359.3    | 430.747                | --       | --              | 469.361  | 491.235    | -- | 625.788 | 1272.92 |
| 10                 | 113.042             | --       | 161.861  | --       | 335.122  | 359.3    | 430.747                | --       | --              | 469.043  | 491.235    | -- | 625.788 | 1272.92 |
| 15                 | 113.042             | --       | 161.861  | --       | 335.122  | 359.256  | 430.747                | --       | --              | 469.043  | 491.235    | -- | 625.788 | 1272.92 |
| 20                 | 112.366             | --       | 161.861  | --       | 335.122  | 359.256  | 430.747                | --       | --              | 469.043  | 491.235    | -- | 625.788 | 1272.92 |
| 25                 | 112.704             | --       | 161.861  | --       | 335.122  | 359.256  | 430.747                | --       | --              | 469.043  | 491.551    | -- | 625.788 | 1272.92 |
| 30                 | 113.042             | 141.048  | 161.861  | --       | 335.122  | 359.256  | 430.747                | --       | --              | 469.043  | 491.551    | -- | 625.788 | 1272.92 |
| 35                 | 113.042             | 141.048  | 161.861  | --       | 335.122  | 359.256  | 430.747                | --       | --              | 469.043  | 491.551    | -- | 625.788 | 1272.92 |
| 40                 | 113.042             | 141.048  | 161.861  | --       | 335.122  | 359.256  | 430.747                | --       | --              | 469.043  | 490.919    | -- | 625.788 | 1272.92 |
| 45                 | 113.042             | 141.048  | 161.861  | --       | 335.122  | 357.651  | 430.747                | --       | --              | 469.043  | 490.919    | -- | 625.788 | 1272.92 |
| 50                 | 113.042             | 141.048  | 161.861  | --       | 335.122  | 357.651  | 430.747                | --       | --              | 469.043  | 490.919    | -- | 625.788 | 1272.92 |
| 55                 | 113.042             | 141.048  | 161.861  | --       | 335.122  | 357.651  | 430.747                | --       | --              | 469.043  | 490.919    | -- | 625.788 | 1272.92 |
| 60                 | 113.042             | 141.048  | 161.861  | --       | 335.122  | 357.651  | 430.747                | --       | --              | 469.043  | 490.919    | -- | 625.788 | 1272.92 |
| 65                 | 113.042             | 141.048  | 161.861  | --       | 335.122  | 357.651  | 430.747                | --       | --              | 469.043  | 490.919    | -- | 625.788 | 1272.92 |
| 70                 | 113.042             | 141.048  | 161.861  | --       | 335.122  | 357.651  | 430.747                | --       | --              | 469.043  | 490.919    | -- | 625.788 | 1272.92 |
| 80                 | 113.042             | 141.048  | 161.861  | --       | 334.479  | 357.651  | 430.747                | --       | --              | 469.043  | 490.919    | -- | 625.788 | 1272.92 |
| 90                 | 113.042             | 141.048  | 161.861  | --       | 335.445  | 358.293  | 430.747                | --       | --              | 469.043  | 490.919    | -- | 625.788 | 1272.92 |
| 100                | 113.042             | 141.048  | 161.861  | --       | 335.445  | 358.293  | 430.747                | --       | --              | 469.043  | 490.919    | -- | 625.788 | 1272.92 |
| 110                | 113.042             | 141.048  | 161.861  | --       | 335.445  | 357.972  | 429.464                | --       | --              | 469.043  | 490.919    | -- | 625.788 | 1272.92 |
| 150                | 112.862             | 141.209  | 161.5903 | --       | 336.413  | 357.972  | 427.633                | --       | --              | 469.78   | 490.919    | -- | 625.788 | 1287.41 |
| 200                | 112.862             | 141.209  | 161.1702 | --       | 335.638  | 357.847  | 426.35                 | --       | --              | 469.78   | 491.657    | -- | 625.788 | 1289.11 |
| 250                | 111.846             | 141.209  | 160.684  | --       | 333.702  | 356.563  | 424.681                | --       | --              | 467.237  | 489.758    | -- | 625.788 | 1289.11 |
| 300                | 111.846             | 141.209  | 160.35   | --       | 333.702  | 356.563  | 424.103                | --       | --              | 467.237  | 489.758    | -- | 625.788 | 1289.11 |

Table S2: Raman-active phonon modes as a function of temperature for  $\text{Tm}_{0.5}\text{Eu}_{0.5}\text{FeO}_3$  compound.

| Temperature | $A_{1g}/B_{1g}$     | $A_{1g}$ | $B_{1g}$ | $B_{1g}$ | $A_{1g}$ | $B_{2g}$ | $A_{1g}/B_{2g}/B_{3g}$ | $B_{2g}$ | $A_{1g}/B_{1g}$ | $B_{1g}$ | Two phonon |
|-------------|---------------------|----------|----------|----------|----------|----------|------------------------|----------|-----------------|----------|------------|
| (K)         | (cm <sup>-1</sup> ) |          |          |          |          |          |                        |          |                 |          |            |
| 5           | 111.854             | 145.587  | 163.36   | 325.618  | 347.876  | 367.788  | 436.192                | 483.755  | 510.179         | 632.366  | --         |
| 10          | 112.192             | 145.587  | 163.36   | 325.434  | 347.876  | 367.788  | 436.192                | 483.755  | 510.179         | 632.366  | --         |
| 15          | 112.366             | 145.083  | 163.36   | 325.434  | 347.876  | 367.788  | 436.192                | 482.331  | 510.129         | 631.578  | 1277.4     |
| 20          | 112.366             | 145.083  | 163.36   | 325.434  | 347.876  | 367.788  | 436.192                | 482.331  | 510.76          | 631.578  | 1277.4     |
| 25          | 112.028             | 145.083  | 163.36   | 325.434  | 347.876  | 367.788  | 436.192                | 482.371  | 511.113         | 631.612  | 1277.4     |
| 30          | 112.028             | 145.083  | 163.36   | 325.434  | 347.876  | 367.788  | 436.192                | 482.371  | 511.113         | 631.612  | 1277.4     |
| 35          | 112.028             | 145.083  | 163.36   | 325.434  | 347.876  | 367.788  | 436.192                | 482.371  | 511.113         | 631.612  | 1277.4     |
| 40          | 112.028             | 145.083  | 163.36   | 325.434  | 347.876  | 367.788  | 436.192                | 482.371  | 511.113         | 631.612  | 1277.4     |
| 45          | 112.028             | 143.402  | 163.36   | 325.434  | 347.876  | 367.788  | 436.192                | 482.371  | 511.113         | 631.612  | 1277.4     |
| 50          | 112.028             | 143.402  | 163.36   | 324.463  | 347.876  | 367.788  | 436.192                | 482.371  | 511.113         | 631.612  | 1277.4     |
| 55          | 112.028             | 143.402  | 163.36   | 324.463  | 347.876  | 367.788  | 436.192                | 482.371  | 511.113         | 631.612  | 1277.4     |
| 60          | 112.028             | 141.384  | 163.36   | 324.463  | 347.876  | 367.788  | 436.192                | 482.371  | 511.113         | 631.612  | 1277.4     |
| 65          | 112.028             | 141.384  | 163.36   | 324.463  | 347.876  | 367.788  | 436.192                | 482.371  | 511.113         | 631.612  | 1277.4     |
| 70          | 112.028             | 141.384  | 163.36   | 324.463  | 347.876  | 367.788  | 436.192                | 482.371  | 511.113         | 631.612  | 1277.4     |
| 80          | 112.028             | 140.375  | 163.36   | 324.463  | 347.876  | 367.788  | 436.192                | 482.371  | 511.113         | 631.612  | 1277.4     |
| 90          | 112.028             | 140.375  | 163.36   | 324.463  | 347.876  | 367.788  | 436.192                | 482.371  | 511.113         | 631.612  | 1277.4     |
| 100         | 112.366             | 140.271  | 163.36   | 324.463  | 347.876  | 367.788  | 436.192                | 482.371  | 511.113         | 631.612  | 1295.76    |
| 110         | 112.366             | 139.365  | 161.405  | 323.817  | 347.891  | 367.788  | 436.192                | 482.371  | 511.113         | 631.693  | 1297.12    |
| 150         | 112.524             | 138.853  | 162.043  | 323.817  | 347.695  | 367.788  | 437.246                | 483.427  | 511.854         | 631.752  | 1297.32    |
| 200         | 111.846             | 138.18   | 162.456  | 324.331  | 347.191  | 367.788  | 437.246                | 483.427  | 510.595         | 631.752  | 1297.32    |
| 250         | 111.508             | 137.843  | 162.827  | 324.331  | 346.581  | 367.788  | 437.246                | 483.427  | 508.074         | 631.752  | 1297.32    |
| 300         | 111.508             | 137.843  | 163.222  | 324.331  | 345.951  | 367.788  | 437.246                | 483.427  | 508.074         | 631.752  | 1297.32    |

## Supplementary Information (SI-2)

We have calculated bond-length, bond-angle as shown in Table S3 by using Fullprof software [1]. Further, the change in the rotation and distortion associated with FeO<sub>6</sub> octahedra also leads to the change in the Fe–O–Fe bond-angles, Fe–O bond-lengths and Fe-Fe atom distance. Again, in perovskite systems it is important to note that the tilt angles (rotation with FeO<sub>6</sub>), Fe–O bond-length and Fe–O–Fe angle can be tuned either by external pressure or by doping of ions at crystallographic R/Fe-sites. Therefore, Eu doping at Tm-sites can change these parameters strongly and can affects the physical properties. Here, we have also calculated the tilting angles by using the related unit-cell metrics [2].

| Table S3: Bond-lengths (Å), bond, and tilt-angles (degree).                    |                                                                               |
|--------------------------------------------------------------------------------|-------------------------------------------------------------------------------|
| TmFeO <sub>3</sub>                                                             | Tm <sub>0.50</sub> Eu <sub>0.50</sub> FeO <sub>3</sub>                        |
| Tm-O1 = 2.627                                                                  | Tm-O1 = 2.6608                                                                |
| Tm-O1 = 2.329                                                                  | Tm-O1 = 1.703                                                                 |
| Tm-O2 = 2.2903                                                                 | Tm-O2 = 2.759                                                                 |
| Tm-O2 = 2.145                                                                  | Tm-O2 = 2.35                                                                  |
|                                                                                | Tm-O2 = 2.146                                                                 |
| Fe-O1 = 2.0199                                                                 | Tm-O2 = 2.709                                                                 |
| Fe-O1 = 1.9626                                                                 |                                                                               |
| Fe-O2 = 2.0373                                                                 | Fe-O1 = 2.2473                                                                |
|                                                                                | Fe-O2 = 1.80760                                                               |
| Fe-O1-Fe = 148.38°                                                             | Fe-O2 = 2.0747                                                                |
| Fe-O2-Fe = 137.47°                                                             |                                                                               |
|                                                                                | Fe-O1-Fe = 116.57°                                                            |
|                                                                                | Eu-O1-Eu = 136.41°                                                            |
|                                                                                | Eu-O2-Eu = 169.72°                                                            |
|                                                                                | Fe-O2-Fe = 169.172°                                                           |
| Tilt-angles for TmFeO <sub>3</sub>                                             | Tilt-angles for Tm <sub>0.50</sub> Eu <sub>0.50</sub> FeO <sub>3</sub>        |
| $\theta_{\text{oct}} = (180 - 148.38)/2 = 31.72$                               | $\theta_{\text{oct}} = (180 - 116.57)/2 = 31.72$                              |
| $\phi_{\text{oct}} = (180 - 137.47)/2 = 21.265$                                | $\phi_{\text{oct}} = (180 - 169.72)/2 = 5.14$                                 |
| $\theta_{\text{oct}} = \cos^{-1}(a/b) = \cos^{-1}(0.94209) = 19.59$            | $\theta_{\text{oct}} = \cos^{-1}(a/b) = \cos^{-1}(0.94209) = 18.214$          |
| $\phi_{\text{oct}} = \cos^{-1}(\text{sqrt}2a/c) = \cos^{-1}(0.9786) = 11.8746$ | $\phi_{\text{oct}} = \cos^{-1}(\text{sqrt}2a/c) = \cos^{-1}(0.9786) = 10.275$ |

**Reference:**

- [1] J. Rodriguez-Carvajal, Recent advances in magnetic structure determination by neutron powder diffraction, *Physica B: Condensed Matter* 192, 55 (1993).
- [2] Yusheng Zhao, Donald J. Weidner, John B. Parise, and David E. Cox, *Phys. of the Earth and Planetary Interiors*, 76, 1—16 (1993).
